# Supplementary material
Source: publisher site journal article supplement (https://www.dovepress.com/article/supplementary_file/574743/574743_Supplementary%20Tables%20S1-S2_1.docx)
Supplement: Supplementary file 1 [file 574743_Supplementary%20Tables%20S1-S2_1.docx]

**Supplementary Materials**

**Supplementary Table S1. Additional Sample Characteristics**

| **Characteristics, n (%)** | **BMI <25 kg/m2 (N=99; 13.3%)** | **BMI 25–29.9 kg/m2 (N=208; 27.9%)** | **BMI 30–34.9 kg/m2 (N=174; 23.3%)** | **BMI 35–39.9 kg/m2 (N=155; 20.8%)** | **BMI ≥40 kg/m2 (N=110; 14.7%)** |
| --- | --- | --- | --- | --- | --- |
| **Sex at birth***** | | | | | |
| Male | 58 (58.6) | 142 (68.3) | 100 (57.5) | 77 (49.7) | 35 (31.8) |
| Female | 41 (41.4) | 66 (31.7) | 74 (42.5) | 78 (50.3) | 75 (68.2) |
| **Residential setting,**** | | | | | |
| Rural/countryside | 13 (13.1) | 37 (17.8) | 39 (22.4) | 42 (27.1) | 28 (25.5) |
| Suburban | 43 (43.4) | 92 (44.2) | 85 (48.9) | 69 (44.5) | 35 (31.8) |
| Urban areas and cities | 43 (43.4) | 79 (38.0) | 50 (28.7) | 44 (28.4) | 47 (42.7) |
| **Marital status***** | | | | | |
| Married or in a civil relationship | 68 (68.7) | 145 (69.7) | 113 (64.9) | 83 (53.5) | 49 (44.5) |
| Single | 13 (13.1) | 31 (14.9) | 23 (13.2) | 34 (21.9) | 37 (33.6) |
| Divorced or separated | 11 (11.1) | 20 (9.6) | 24 (13.8) | 28 (18.1) | 19 (17.3) |
| Widowed/ widower | 7 (7.1) | 12 (5.8) | 14 (8.0) | 10 (6.5) | 5 (4.5) |
| **Employment status***** |  |  |  |  |  |
| Full-time work | 26 (26.3) | 84 (40.4) | 65 (37.4) | 41 (26.5) | 25 (22.7) |
| Part-time work | 15 (15.2) | 15 (7.2) | 11 (6.3) | 16 (10.3) | 11 (10.0) |
| Homemaker | 2 (2.0) | 5 (2.4) | 6 (3.4) | 5 (3.2) | 5 (4.5) |
| Student | – | – | 1 (0.6) | – | 1 (0.9) |
| Unemployed | 3 (3.0) | 2 (1.0) | 6 (3.4) | 12 (7.7) | 4 (3.6) |
| Retired | 47 (47.5) | 94 (45.2) | 74 (42.5) | 67 (43.2) | 40 (36.4) |
| Disabled | 6 (6.1) | 7 (3.4) | 11 (6.3) | 14 (9.0) | 24 (21.8) |
| Other | – | 1 (0.5) | – | – | – |
| **Highest level of education (pooled)*** | | | | | |
| Up to secondary/high school/GED | 12 (12.1) | 30 (14.4) | 31 (17.8) | 31 (20.0) | 21 (19.1) |
| Associate’s degree, trade school, some college, CEGEP, apprenticeship, vocational, and technical | 21 (21.2) | 47 (22.6) | 42 (24.1) | 49 (31.6) | 36 (32.7) |
| College/university degree | 42 (42.4) | 78 (37.5) | 70 (40.2) | 62 (40.0) | 38 (34.5) |
| Post-graduate | 24 (24.2) | 53 (25.5) | 31 (17.8) | 13 (8.4) | 15 (13.6) |
| **Yearly household total Income (pooled)***** | | | | | |
| Less than $25,000/ Less than C$35,000 | 10 (10.1) | 19 (9.1) | 19 (10.9) | 28 (18.1) | 35 (31.8) |
| $25,000 to $49,999/ C$35,000 to C$69,999 | 25 (25.3) | 47 (22.6) | 53 (30.5) | 38 (24.5) | 32 (29.1) |
| $50,000 to $74,999/ C$70,000 to C$104,999 | 19 (19.2) | 55 (26.4) | 38 (21.8) | 37 (23.9) | 13 (11.8) |
| $75,000 to $99,999/ C$105,000 to C$139,999 | 14 (14.1) | 27 (13.0) | 20 (11.5) | 24 (15.5) | 11 (10.0) |
| $100,000 to $124,999/ C$140,000 to C$174,999 | 12 (12.1) | 41 (19.7) | 25 (14.4) | 15 (9.7) | 12 (10.9) |
| $125,000+/ C$175,000+ | 15 (15.2) | 17 (8.2) | 15 (8.6) | 9 (5.8) | 4 (3.6) |
| Prefer not to answer | 4 (4.0) | 2 (1.0) | 4 (2.3) | 4 (2.6) | 3 (2.7) |
| **Insurance (pooled)** | | | | | |
| None (uninsured) + currently uninsured | 1 (1.0) | 6 (2.9) | 3 (1.7) | 7 (4.5) | 4 (3.6) |
| Any insurance | 98 (99.0) | 202 (97.1) | 171 (98.3) | 148 (95.5) | 106 (96.4) |
| **How long have you been diagnosed with T2D? (years), mean (SD)** | 13.2 (10.4) | 11.0 (8.5) | 10.6 (9.0) | 10.7 (8.8) | 10.9 (8.7) |
| **Heart health** | 72 (72.7) | 151 (72.6) | 124 (71.3) | 98 (63.2) | 72 (65.5) |
| **Joint health** | 42 (42.4) | 108 (51.9) | 74 (42.5) | 62 (40.0) | 43 (39.1) |

*P* values represent chi‐squared tests for categorical variables and *t*‐tests for continuous variables to test for differences across BMI groups.

* Indicates *P*<0.05; **Indicates *P*<0.01; *** Indicates *P*<0.001
Abbreviations: BMI = body mass index; SD = standard deviation; T2D = type 2 diabetes

**Supplementary Table S2. T2D and Weight Management (N=746)**

| **Response options, n (%)** | **BMI <25 kg/m2 (N=99; 13.3)** | **BMI 25–29.9 kg/m2 (N=208; 27.9)** | **BMI 30–34.9 kg/m2 (N=174; 23.3)** | **BMI 35–39.9 kg/m2 (N=155; 20.8)** | **BMI ≥40 kg/m2 (N=110; 14.7)** |
| --- | --- | --- | --- | --- | --- |
| **In an average day, how often do you think about how an action or decision you are making may affect your weight (for example, choosing between food options, taking the stairs or elevator)?***** | | | | | |
| Never | 31 (31.3) | 28 (13.5) | 17 (9.8) | 11 (7.1) | 7 (6.4) |
| 1–2 times a day | 52 (52.5) | 117 (56.2) | 97 (55.7) | 83 (53.5) | 52 (47.3) |
| 3–4 times a day | 11 (11.1) | 52 (25.0) | 35 (20.1) | 42 (27.1) | 29 (26.4) |
| 5–6 times a day | 4 (4.0) | 7 (3.4) | 16 (9.2) | 9 (5.8) | 15 (13.6) |
| 7–9 times a day | – | 1 (0.5) | 3 (1.7) | 4 (2.6) | 2 (1.8) |
| 10 times a day or more | 1 (1.0) | 3 (1.4) | 6 (3.4) | 6 (3.9) | 5 (4.5) |
| **To what extent do you want the healthcare provider who is helping to manage your diabetes to be involved with helping you to lose weight?**** | | | | | |
| Not at all involved | 26 (26.3) | 26 (12.5) | 17 (9.8) | 16 (10.3) | 9 (8.2) |
| Somewhat involved | 20 (20.2) | 45 (21.6) | 36 (20.7) | 45 (29.0) | 24 (21.8) |
| Moderately involved | 27 (27.3) | 52 (25.0) | 55 (31.6) | 48 (31.0) | 36 (32.7) |
| Very involved | 19 (19.2) | 63 (30.3) | 46 (26.4) | 31 (20.0) | 23 (20.9) |
| Extremely involved | 7 (7.1) | 22 (10.6) | 20 (11.5) | 15 (9.7) | 18 (16.4) |
| **In the past two years, has the healthcare provider who is helping to manage your diabetes discussed your weight with you?** | | | | | |
| **Yes ***** | 49 (49.5) | 148 (71.2) | 138 (79.3) | 118 (76.1) | 88 (80.0) |
| **Who initiated the conversation about your weight that you had with the healthcare provider who is helping to manage your diabetes? a**** | | | | | |
| Me | 26 (53.1) | 63 (42.6) | 42 (30.4) | 38 (32.2) | 33 (37.5) |
| The healthcare provider who is helping to manage my diabetes | 23 (46.9) | 83 (56.1) | 92 (66.7) | 80 (67.8) | 53 (60.2) |
| A family member or friend | – | 2 (1.4) | 4 (2.9) | – | 2 (2.3) |
| Other | – | – | – | – | – |
| Not applicable | 50 (50.5) | 60 (28.8) | 36 (20.7) | 37 (23.9) | 22 (20.0) |
| **How comfortable were you with discussing your weight with the healthcare provider who is helping to manage your diabetes? a***** | | | | | |
| Extremely uncomfortable | 1 (2.0) | 3 (2.0) | 2 (1.4) | 2 (1.7) | 3 (3.4) |
| Somewhat uncomfortable | 1 (2.0) | 5 (3.4) | 11 (8.0) | 12 (10.2) | 16 (18.2) |
| Neither comfortable nor uncomfortable | 2 (4.1) | 18 (12.2) | 19 (13.8) | 7 (5.9) | 10 (11.4) |
| Somewhat comfortable | 11 (22.4) | 43 (29.1) | 43 (31.2) | 48 (40.7) | 27 (30.7) |
| Extremely comfortable | 34 (69.4) | 79 (53.4) | 63 (45.7) | 49 (41.5) | 32 (36.4) |
| Not applicable | 50 (50.5) | 60 (28.8) | 36 (20.7) | 37 (23.9) | 22 (20.0) |
| **Did you make any changes to your life after that conversation? a** | | | | | |
| I never made changes | 7 (14.3) | 9 (6.1) | 8 (5.8) | 6 (5.1) | 5 (5.7) |
| I thought about changes but did not implement them in my life | 9 (18.4) | 16 (10.8) | 23 (16.7) | 13 (11.0) | 18 (20.5) |
| I made changes but did not maintain them | 11 (22.4) | 59 (39.9) | 59 (42.8) | 52 (44.1) | 41 (46.6) |
| I made changes and did maintain them | 22 (44.9) | 64 (43.2) | 48 (34.8) | 47 (39.8) | 24 (27.3) |
| Not applicable | 50 (50.5) | 60 (28.8) | 36 (20.7) | 37 (23.9) | 22 (20.0) |

*P* values represent chi‐squared tests for categorical variables and *t*‐tests for continuous variables to test for differences across BMI groups.

**Indicates *P*<0.01; *** Indicates *P*<0.001

a Calculated from those participants who had discussed weight with their healthcare provider.

Abbreviations: BMI = body mass index; T2D = type 2 diabetes
